# Supplementary material
Source: PubMed Central journal article supplement (PMC3268364)

## **Supporting information:**

### **Peptide Synthesis**

All buffers and salts were purchased from Fisher Scientific. Protected amino acids were purchased from Peptides International, and maleimidohexanoic acid from Sigma-Aldrich. SPv and SPv-NLS were synthesized using *t*-boc solid-phase peptide synthesis as described<sup>11</sup> and confirmed by MALDI TOF MS.

### **GFP conjugation:**

GFP was expressed using *E. coli* BL-21 DE3 harboring the plasmid coding for GFP with a 6-his tag, induced by 1 mM IPTG at 0.6 OD<sub>600nm</sub> at 22°C overnight. The protein was purified by Ni-NTA affinity chromatography and dialyzed into labeling buffer (20 mM MOPS, 150 mM NaCl, pH 6.9). SPDP (Thermo-Fisher) dissolved in DMSO was added in a 10-fold molar excess to the protein, incubated for 1 hr at room temp, then the protein-SPDP conjugate was purified by gel filtration using a 10-DG column (Biorad). A 50-fold molar excess of SPv dissolved in DMSO was added to the GFP-SPDP conjugate in the presence of 1 mM TCEP, incubated for 1 hr at room temp, then purified using gel filtration.

### **DNA conjugation:**

The DNA fragment was generated by PCR using 5'-modified primers (see text) from IDT and isolated from a 1.5% agarose gel (Qiagen). The fragment was conjugated to SPv-NLS as described for GFP conjugation. The concentration of the final product was determined using the extinction coefficient  $\epsilon_{650nm} = 237,000 \text{ M}^{-1}\text{cm}^{-1}$ .

**Phage Conjugation:**

XL1-Blue *E. coli* cells were transformed with peGFP-N1, and a single colony was picked and grown in 1 mL 2XYT/kanamycin media for 8 hrs, infected with M13 KO7 bacteriophage ( $10^{10}$  phage/mL) for 30 min, then transferred to 30 mL 2XYT/kanamycin overnight. The culture was centrifuged for 10 minutes at 4000g and the phage was precipitated by mixing the supernatant with 6 mL of 20% w/v PEG 8000, 2.5 M NaCl incubated for 30 min on ice, followed by centrifugation for 10 minutes at 4000g. The phage pellet was resuspended in 1 mL of PBS (137 mM NaCl, 2.7 mM KCl, 4.3 mM  $\text{Na}_2\text{HPO}_4$ , 1.47 mM  $\text{KH}_2\text{PO}_4$ , pH 7.5). SPDP and Cy5-NHS ester (GE Healthcare) were added at 100-fold excess over phage particles. After 1.5 hour shaking at RT, precipitation with 20% PEG 8000/2.5 M NaCl was carried twice to clean up the reaction from the unattached fluorophore and crosslinkers. The resuspended phage was incubated with 100-fold excess of SPv in the presence of 1 mM TCEP at RT with shaking for 1.5 hour. The final conjugate was purified by 2 rounds of precipitation and resuspension in PBS.

**Bead conjugation:**

1  $\mu\text{m}$  amine modified beads (Bangs laboratories, Inc) were centrifuged and resuspended in PBS. Cy5-NHS and SPDP (dissolved in DMSO) were added at 0.1 mM final concentration to 1 mL of resuspended beads for 1 hr at room temp. Excess Cy5 and SPDP were removed from the beads and SPv was added to the resuspended beads at 1 mM final concentration, incubated for 1 hr at room temp, then the supernatant was removed and the conjugated beads were resuspended in PBS.

**Tissue culture**

HeLa cells were transfected with the pNK1R (in pCDNA 3.1) using lipofectamine 2000 (Invitrogen) according to manufacturer's instructions. Lysates of transfected and untransfected were loaded (20  $\mu$ g total protein/well) on 15% SDS polyacrylamide gel and used for western blot using polyclonal anti-NK1R antibodies (Abcam). Cells (U87 or HeLa) were plated on glass coverslips in 24-well plates in DMEM supplemented with 10% FBS. Cells were treated with the SPv conjugates (100 nM GFP-SPv, 200 pM DNA-SPv-NLS,  $10^{10}$  phage-SPv/mL). After incubation with the conjugate, the cells were washed with PBS and fixed with 4% *p*-formaldehyde for 20 minutes, then washed with PBS + 0.1% Tween. DAPI was used for nuclear staining. Confocal imaging was carried out on a Leica AB2 microscope. Images were overlaid and processed using ImageJ software.

**Supporting Figure 1: Trasfection of HeLa cells with the NK1R.** Lane 1: untransfected HeLa cells, lane 2: HeLa cells transfected with the NK1R showing the expression of the receptor (red box).

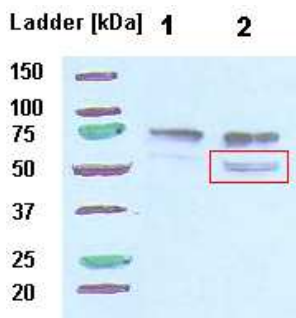

Supplement: NIHMS346381-supplement-1_si_001.pdf [file NIHMS346381-supplement-1_si_001.pdf]
